# Supplementary material for: Effects of 4-tert-butylpyridine on perovskite formation and performance of solution-processed perovskite solar cells
Source: Royal Society of Chemistry journal article supplement (doi:10.1039/c5ta05988g), 2015-01-01
Supplement: c5ta05988g1.pdf [file c5ta05988g1.pdf]

Electronic Supplementary Material (ESI) for Journal of Materials Chemistry A. This journal is © The Royal Society of Chemistry 2015

## Supplementary Information

### Effect of 4-tert-butylpyridine on Perovskite Formation and Performance of Solution-Processed Perovskite Solar Cells

Yantao Shi,<sup>\*,a</sup> Xiangyuan Wang,<sup>a</sup> Hong Zhang,<sup>a</sup> Bo Li,<sup>a</sup> Huilan Lu,<sup>a</sup> Tingli Ma,<sup>b</sup> Ce Hao<sup>a</sup>

<sup>a</sup>State Key laboratory of Fine Chemicals, School of Chemistry, Dalian University of Technology, Dalian, 116024, China

<sup>b</sup>School Petroleum and Chemical Engineering, Dalian University of Technology, Panjin Campus, Panjin, 124221, P. R. China.

\*To whom correspondence should be addressed-mail: [shiyantao@dlut.edu.cn](mailto:shiyantao@dlut.edu.cn)

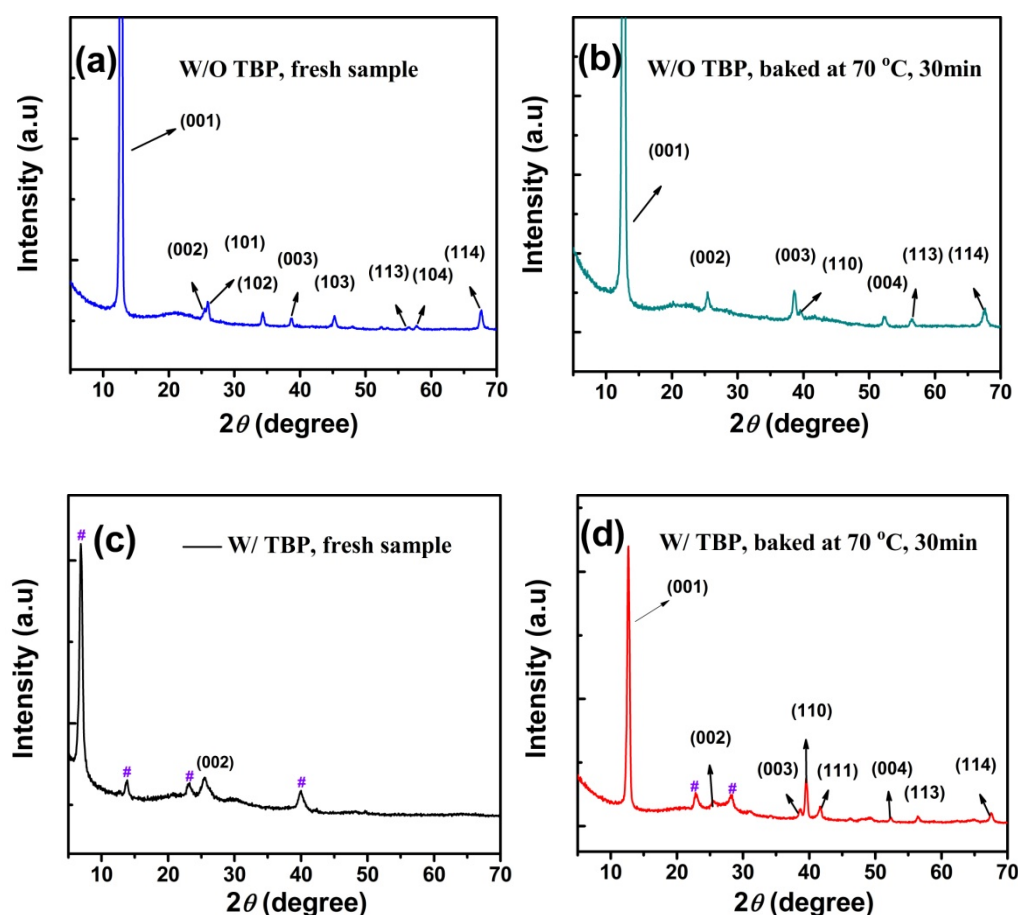

**Figure S1.** XRD pattern of  $\text{PbI}_2$  films prepared under different conditions: (a) fresh sample prepared without TBP-guiding; (b) sample prepared without TBP-guiding and baked at 70 °C for 30min; (c) fresh sample prepared with TBP-guiding; (d) sample with prepared with TBP-guiding

and baked at 70° C for 30min.

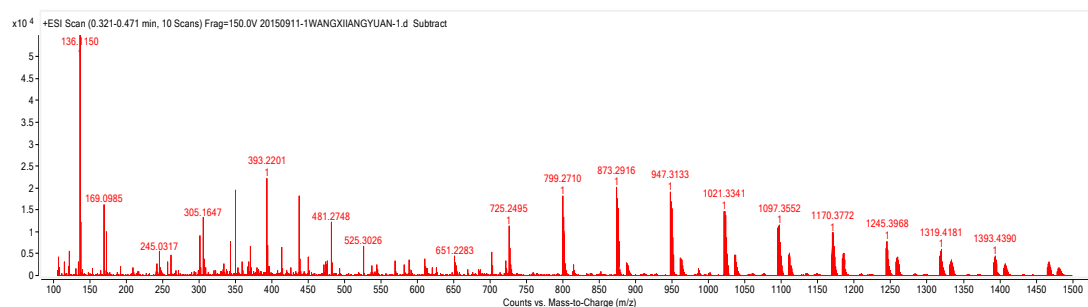

**Figure S2.** High resolution mass spectrometry (HRMS) of TBP-guided  $\text{PbI}_2$  film, this measurement was conducted by re-dissolving the  $\text{PbI}_2$  film into DMF. In the HRMS of TBP-guided  $\text{PbI}_2$  film, we can find the TBP signal (136.1150) clearly.

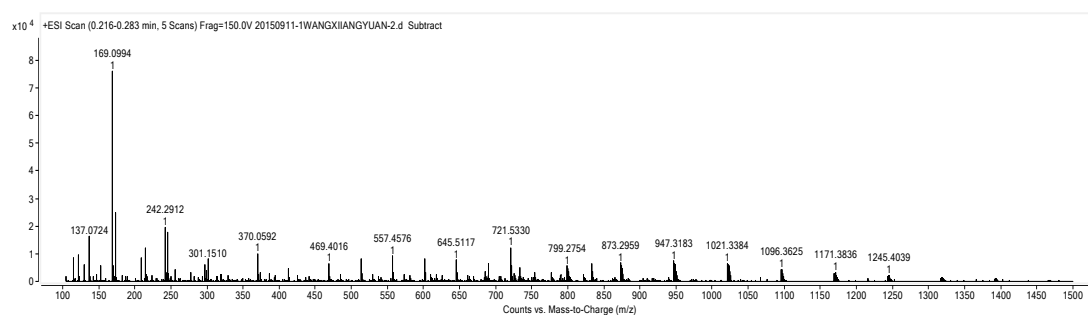

**Figure S3.** HRMS of  $\text{CH}_3\text{NH}_3\text{PbI}_3$  film prepared by TBP-guided two-step route, in which we find no TBP signal, suggesting that TBP has been fully removed after the formation of perovskite.

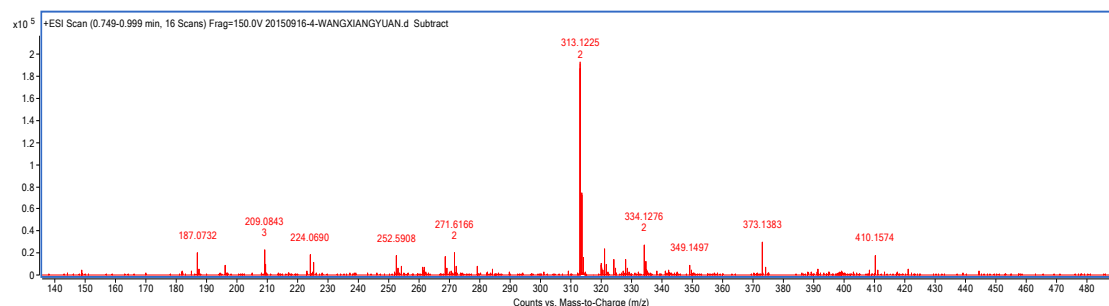

**Figure S4.** HRMS of  $\text{CH}_3\text{NH}_3\text{PbI}_{3-x}\text{Cl}_x$  film prepared by TBP-guided one-step route, in which we find no TBP signal, suggesting that TBP has been fully removed after the formation of perovskite.
